# Supplementary material for: Characterizing the As-Fabricated State of Additively Fabricated IN718 Using Ultrasonic Nondestructive Evaluation
Source: MDPI journal article supplement (doi:10.3390/app13148137), 2023-07-13
Supplement: s1 [file s1]

Archive with 1 entries (1 files):
- applsci-2471242-supplementary.pdf
